# Supplementary material for: Gold-based nanostructures for efficient NIR-II photothermal conversion: hybridizing nanoplates with solid/hollow nanospheres
Source: Royal Society of Chemistry journal article supplement (doi:10.1039/d3ce00390f), 2023-01-01
Supplement: d3ce00390f1.pdf [file d3ce00390f1.pdf]

**Supporting Information**

**Gold-based Nanostructures for Efficient NIR-II Photothermal Conversion: Hybridizing Nanoplates with Solid/Hollow Nanospheres**

Xiansen Tao,<sup>a†</sup> Shiyue Wu,<sup>b†</sup> Yanyun Ma,<sup>c</sup> Xiaoyu Li,<sup>a</sup> Haoyu Sun,<sup>c</sup> Yi Wang,<sup>b\*</sup> and Yiqun Zheng<sup>a\*</sup>

<sup>a</sup> School of Chemistry, Chemical Engineering, and Materials, Jining University, Qufu, Shandong 273155, China

<sup>b</sup> Chongqing Key Laboratory of Green Synthesis and Applications, College of Chemistry, Chongqing Normal University, Chongqing 401331, P. R. China

<sup>c</sup> Institute of Functional Nano & Soft Materials (FUNSOM), Jiangsu Key Laboratory of Advanced Negative Carbon Technologies, Soochow University, Suzhou, 215123, Jiangsu, China

<sup>†</sup>These two authors contribute equally to this work.

\*Corresponding authors: Prof. Dr. Y. Zheng, E-mail: [whzyq@163.com](mailto:whzyq@163.com); Prof. Dr. Yi Wang, E-mail: [ywang@cqu.edu.cn](mailto:ywang@cqu.edu.cn)

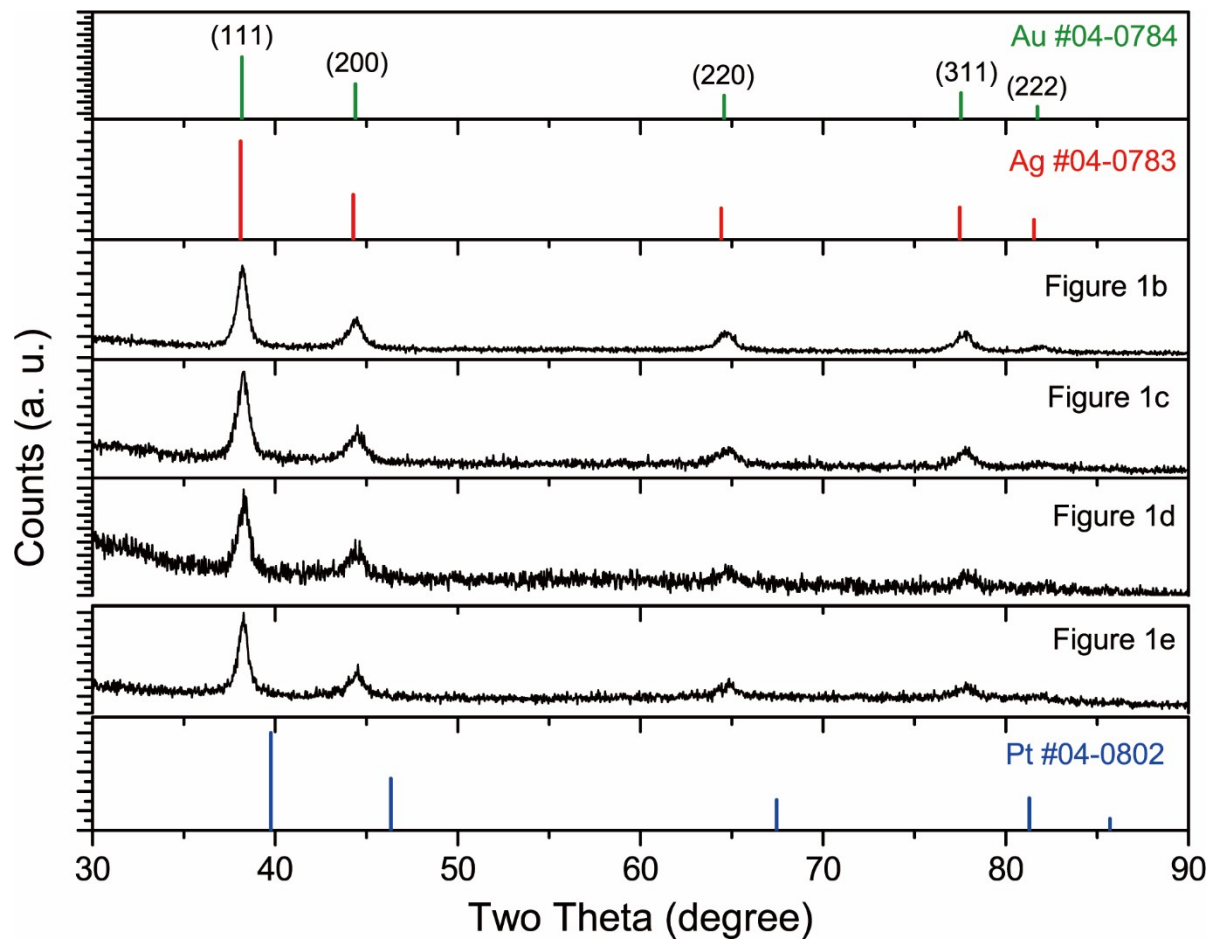

**Figure S1.** XRD patterns of products shown in Figure 1. Standard peaks of Au, Ag, and Pt are provided for reference.

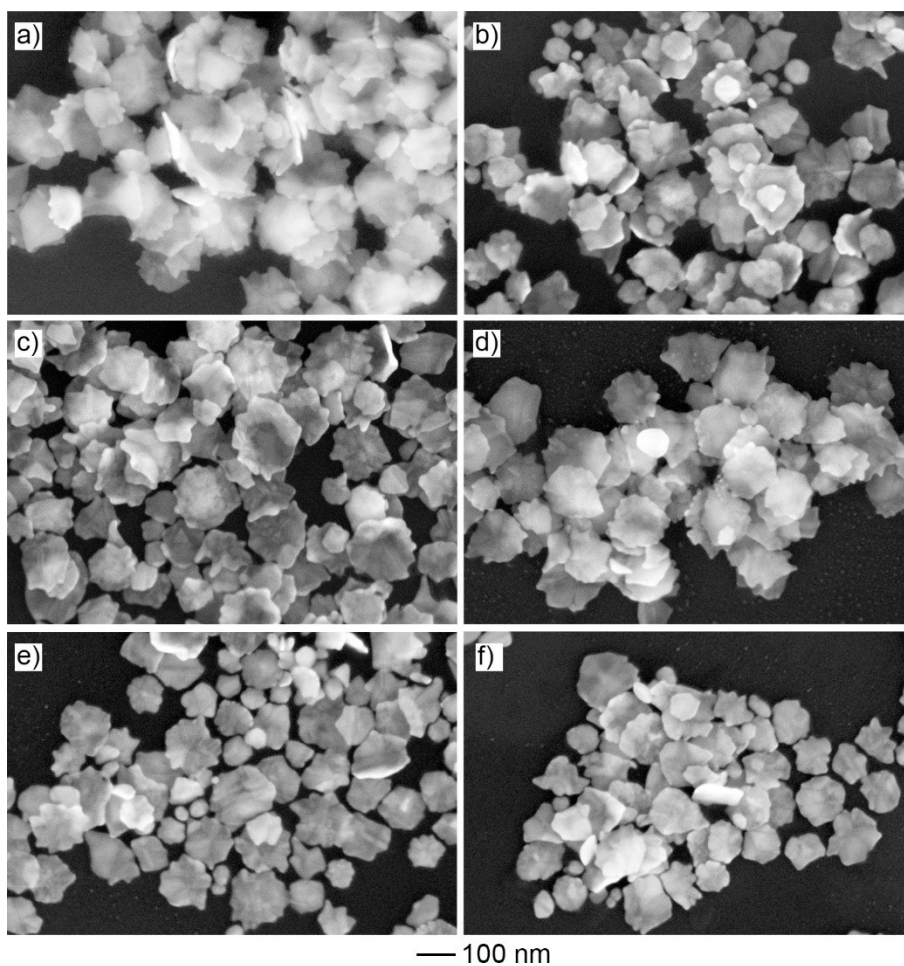

**Figure S2.** SEM images of product obtained *via* the standard procedure, except for the direct use of plate-like Au seeds without surface doping and the extra addition of a-d) aqueous KI (100 mM) solution at the volume of: a) 0, b) 20  $\mu\text{L}$ , c) 300  $\mu\text{L}$ , d) 1000  $\mu\text{L}$ , respectively; e) 100  $\mu\text{L}$  of aqueous KCl (100 mM) solution; f) 100  $\mu\text{L}$  of aqueous KBr (100 mM) solution.

**Table S1.** Information of chemicals and materials used in the present study.

| <b>Name</b>                    | <b>Abbr.</b>                          | <b>Purity</b> | <b>Supplier</b>                           |
|--------------------------------|---------------------------------------|---------------|-------------------------------------------|
| gold(III) chloride trihydrate  | HAuCl <sub>4</sub> ·3H <sub>2</sub> O | 99.9%         | Aladdin Chemical<br>(Shanghai, China)     |
| silver nitrate                 | AgNO <sub>3</sub>                     | 99.8%         |                                           |
| potassium hydroxide            | KOH                                   | 95%           |                                           |
| potassium chloride             | KCl                                   | ≥99%          |                                           |
| Potassium bromide              | KBr                                   | ≥99%          |                                           |
| potassium iodide               | KI                                    | ≥99.0%        |                                           |
| ascorbic acid                  | AA                                    | 99.0%         |                                           |
| cetyltrimethylammonium bromide | CTAB                                  | 99%           |                                           |
| Water                          | /                                     | 18.2 MΩ cm    | Made by Ulupure<br>Ultrafiltration System |

**Table S2.** Information of characterization techniques in the present study.

| <b>Technique</b>                                                                 | <b>Abbr.</b> | <b>Model No.</b>                       | <b>Operation details</b>                                            |
|----------------------------------------------------------------------------------|--------------|----------------------------------------|---------------------------------------------------------------------|
| High-resolution TEM                                                              | HRTEM        | TALOS F200X microscope (FEI)           | accelerating voltage:<br>200 kV                                     |
| high angle annular dark<br>field-scanning<br>transmission electron<br>microscopy | HAADF-STEM   |                                        |                                                                     |
| Energy dispersive X-Ray<br>Spectroscopy                                          | EDS          |                                        |                                                                     |
| Scanning electron<br>microscopy                                                  | SEM          | Ultra60 microscope (Zeiss)             | accelerating voltage:<br>12 kV                                      |
| X-ray photoelectron<br>spectroscopy                                              | XPS          | Thermo Scientific ESCALAB 250Xi<br>XPS | monochromatic Al<br>K <sub>α</sub> radiation<br>( $h\nu=1486.6$ eV) |
| UV-vis-NIR extinction<br>spectroscopy                                            | /            | UV2310II (Techcomp, Shanghai)          | /                                                                   |

**Table S3.** Lateral size of the plate part of the products shown in Figure 1.

| <b>Sample No.</b> | <b>average value (nm)</b> | <b>standard deviation (nm)</b> |
|-------------------|---------------------------|--------------------------------|
| Figure 1b         | 110.7                     | 15.8                           |
| Figure 1c         | 114.7                     | 18.9                           |
| Figure 1d         | 130.9                     | 30.1                           |
| Figure 1e         | 84.2                      | 19.0                           |

### Data recording method for thermal imager

Firstly, connect the thermal imager (FOTRIC 220s) with PC AnalyzIR software, and open the working area of the FOTRIC 220s to ensure that the interface of software can record data. Then, adjust the lens of the thermal imager to align vertically with the sample (a vertical distance of 15 cm) to ensure that the sample image can be collected. Turn on the 808 nm laser ( $1 \text{ W cm}^{-2}$ ) with the vertical distance between the light source and the sample at 15 cm and start recording data with AnalyzIR software at the same time. After that, AnalyzIR software thermal image working area was used for data processing.

### Evaluation of Photothermal Performance.

To evaluate the photothermal performance of different materials, 350  $\mu\text{L}$  of Au NPs, Au@Ag CSNPs, AuPtAg SSOP, and AuPtAg HSOP was placed in 96-well plates and irradiated with a 1064 nm laser ( $0.5 \text{ W cm}^{-2}$ ), respectively. The real-time temperature of each sample was recorded every 20 s using a thermal imager (FOTRIC 220s). Meanwhile, the photothermal stability of the AuPtAg HSOP (1064 nm,  $0.33 \text{ W cm}^{-2}$ ) under five consecutive laser on/off cycles were also evaluated by the same method. A photothermal conversion efficiency ( $\eta$ ) of 55.4% was calculated according to the following formula<sup>1</sup>:

$$\eta = \frac{hA (\Delta T_{max} - \Delta T_{H_2O})}{I (1 - 10^{-A_{1064}})} \times 100\% \quad (1)$$

where  $h$  is the heat transfer coefficient,  $A$  is the surface area for radiative heat transfer,  $\Delta T_{max}$  represents the maximum steady-state temperature in the presence of AuPtAg HSOP relative to

room temperature,  $\Delta T_{\text{H}_2\text{O}}$  represents the maximum steady state temperature of water relative to room temperature,  $I$  is the power density of used laser, and  $A_{1064}$  is the absorbance at 1064 nm.

## Reference

1. Roper, D. K.; Ahn, W.; Hoepfner, M., Microscale Heat Transfer Transduced by Surface Plasmon Resonant Gold Nanoparticles. *Phys. J. Chem. C* 2007, 111(9): 3636–3641, **DOI:** 10.1021/jp064341w.
